# Supplementary material for: Exploring the Metabolic Differences between Cisplatin- and UV Light-Induced Apoptotic Bodies in HK-2 Cells by an Untargeted Metabolomics Approach
Source: MDPI journal article supplement (doi:10.3390/ijms24087237), 2023-04-14
Supplement: s1 [file s1]

# **EXPLORING THE METABOLIC DIFFERENCES BETWEEN CISPLATIN- AND UV LIGHT-INDUCED APOPTOTIC BODIES IN HK-2 CELLS BY AN UNTARGETED METABOLOMICS APPROACH**

Samuel Bernardo-Bermejo<sup>1</sup>, Elena Sánchez-López<sup>2</sup>, María Castro-Puyana<sup>1,3</sup>, Ana B. Fernández-Martínez<sup>4</sup>, Francisco Javier Lucio-Cazaña<sup>5</sup> and María Luisa Marina<sup>1,3, \*</sup>

<sup>1</sup>Universidad de Alcalá, Departamento de Química Analítica, Química Física e Ingeniería Química, Ctra. Madrid-Barcelona Km.33.600, 28871 Alcalá de Henares (Madrid), Spain.

<sup>2</sup>Center for Proteomics and Metabolomics, Leiden University Medical Center, Albinusdreef 2, 2333ZA Leiden, the Netherlands.

<sup>3</sup>Universidad de Alcalá, Instituto de Investigación Química Andrés M, del Río. Ctra. Madrid-Barcelona Km. 33.600, 28871 Alcalá de Henares (Madrid), Spain.

<sup>4</sup>Departamento de Biología, Universidad Autónoma de Madrid, Madrid, Spain.

<sup>5</sup>Universidad de Alcalá, Departamento de Biología de Sistemas, Ctra. Madrid-Barcelona Km. 33.600, 28871 Alcalá de Henares (Madrid), Spain.

**\*Correspondence:** Universidad de Alcalá, Departamento de Química Analítica, Química Física e Ingeniería Química, Ctra. Madrid-Barcelona Km.33.600, 28871 Alcalá de Henares (Madrid), Spain.

**E-mail:** [mluisa.marina@uah.es](mailto:mluisa.marina@uah.es)

**Fax:** +34-91 885 4971

**Tel:** +34-91 885 4935

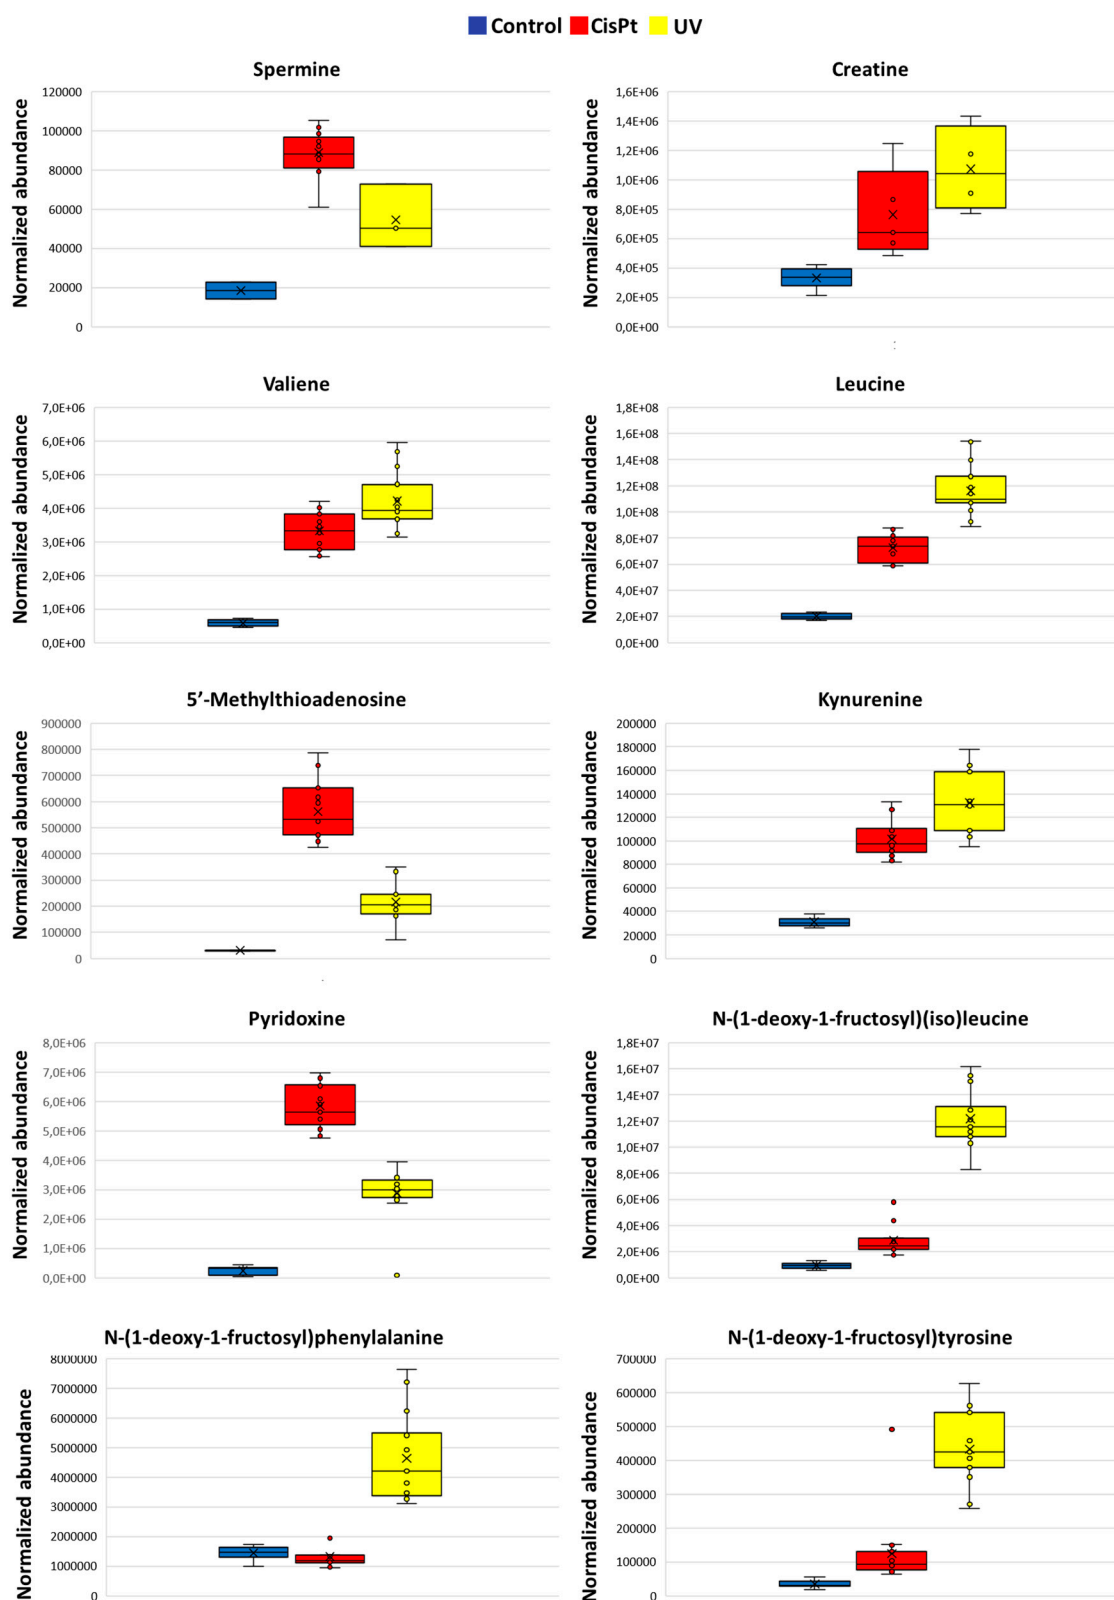

**Figure S1.** Box-plots of the metabolites identified in the ABs fluid.

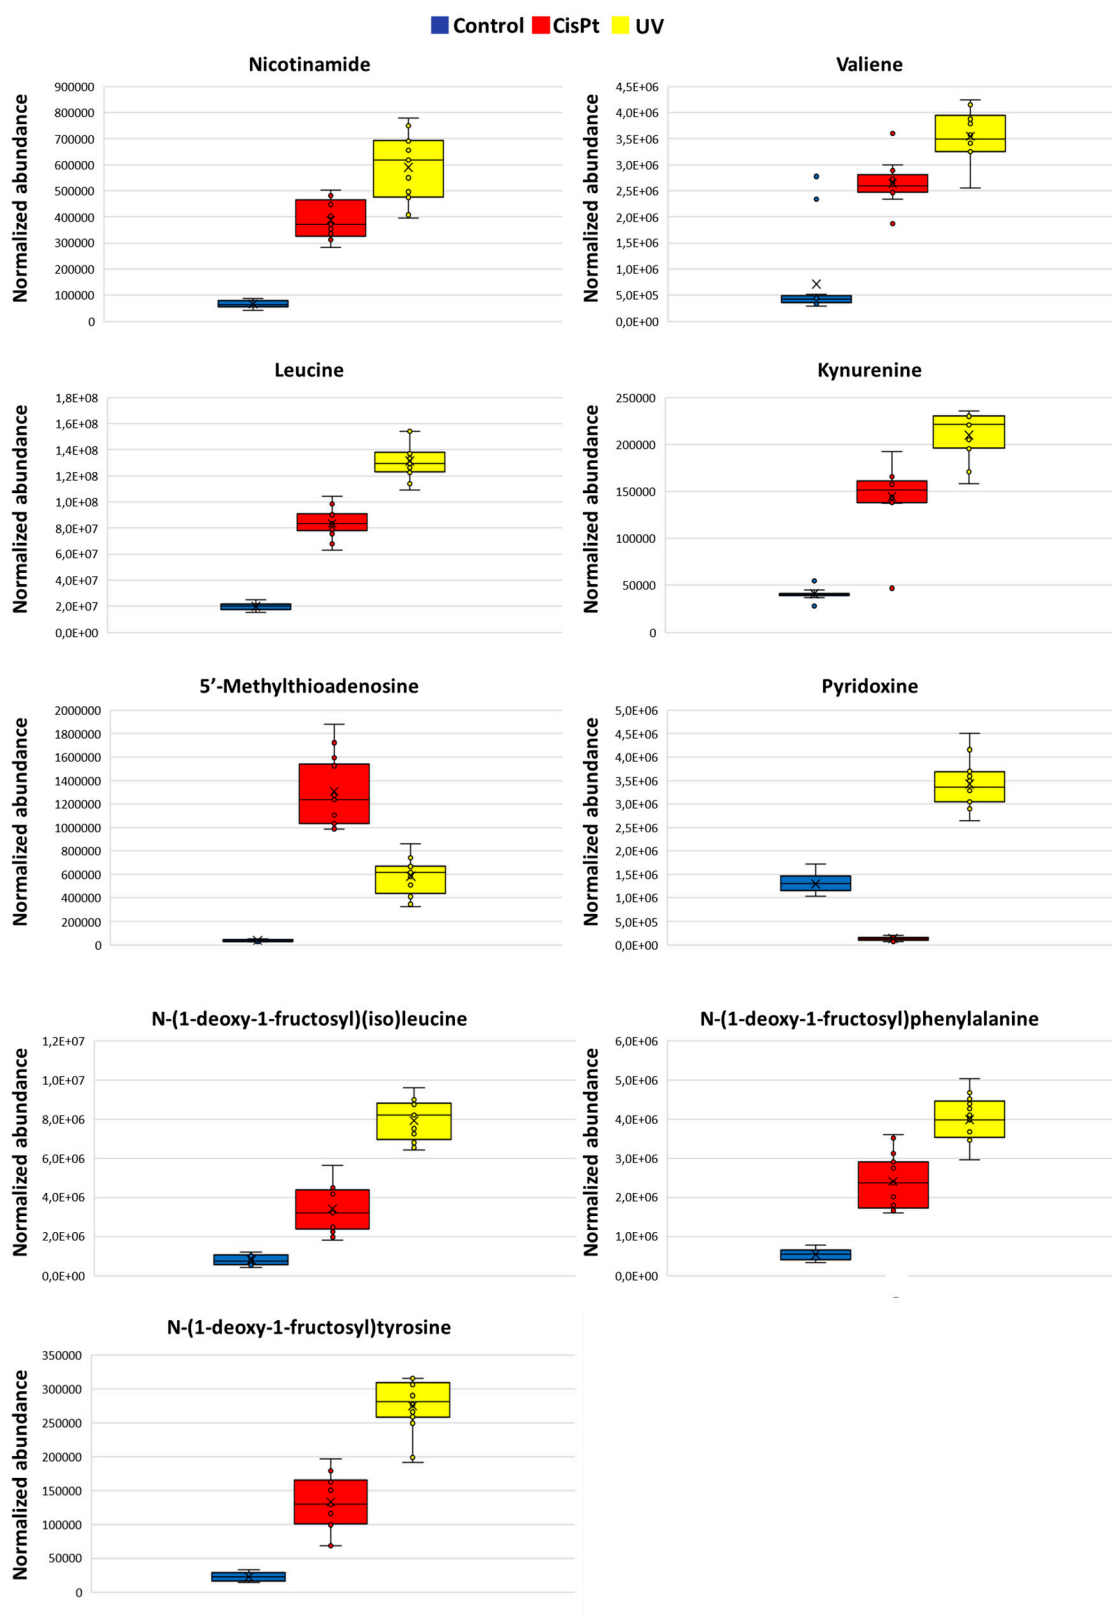

**Figure S2.** Box-plots of the metabolites identified in the extracellular fluid.

**Table S1.** Unknown molecular features (identification level of 4 in the ABs and extracellular fluid) with VIP> 2.0.

| #                   | RT<br>(min) | Monoisotopic<br>mass (Da) | Main fragments (MS/MS)                    | VIP         | Trend* |
|---------------------|-------------|---------------------------|-------------------------------------------|-------------|--------|
|                     |             |                           |                                           | CisPt vs UV |        |
| ABs fluid           |             |                           |                                           |             |        |
| 1                   | 0.7         | 382.1050                  | 203.0546                                  | 2.1         | ↓      |
| 2                   | 0.8         | 158.0192                  | 72.0854, 58.0633, 64.9800, 55.0534        | 2.2         | ↓      |
| 3                   | 0.9         | 85.0885                   | 57.0573, 56.0493                          | 2.3         | ↓      |
| 4                   | 0.9         | 204.1457                  | 86.0944                                   | 3.8         | ↑      |
| 5                   | 1.0         | 145.0730                  | 86.0571, 72.0796, 74.0608                 | 2.9         | ↓      |
| 6                   | 1.0         | 73.0522                   | 58.0286, 59.0353                          | 6.5         | ↑      |
| 7                   | 1.0         | 172.0705                  | 86.0962                                   | 2.0         | ↓      |
| 8                   | 1.1         | 159.0682                  | 132.0810, 130.0636                        | 2.5         | ↓      |
| 9                   | 4.7         | 179.0943                  | 91.0534, 62.0596                          | 2.5         | ↑      |
| 10                  | 6.3         | 508.2097                  | 465.2330, 175.1161                        | 2.2         | ↓      |
| 11                  | 7.9         | 514.1619                  | 335.1050, 217.0613, 160.0426              | 3.0         | ↓      |
| 12                  | 7.9         | 439.1406                  | 160.0408, 263.1010, 176.0707,<br>106.0500 | 2.7         | ↓      |
| 13                  | 8.0         | 481.1522                  | 160.0360, 187.0704, 148.0612              | 2.7         | ↓      |
| 14                  | 8.1         | 514.1618                  | 160.0426, 335.1003, 217.0606              | 2.7         | ↓      |
| 15                  | 8.1         | 453.1555                  | 277.1165, 160.0347, 217.0594              | 2.2         | ↓      |
| 16                  | 8.9         | 379.1557                  | 176.0713, 176.0713                        | 2.5         | ↑      |
| 17                  | 8.9         | 449.1612                  | 116.0694, 160.9437, 176.0714              | 2.5         | ↓      |
| 18                  | 10.2        | 451.1775                  | 118.0869, 98.0580, 72.0859                | 2.6         | ↓      |
| 19                  | 10.4        | 366.1246                  | 160.0439, 217.0635                        | 2.0         | ↓      |
| 20                  | 11.4        | 465.1926                  | 160.0408, 132.0988, 86.0953               | 3.6         | ↓      |
| 21                  | 11.5        | 465.1931                  | 132.1008, 160.0420, 86.0955               | 3.5         | ↓      |
| 22                  | 12.2        | 499.1772                  | 160.0431, 166.0846,120.0809,<br>176.0757  | 2.6         | ↓      |
| 23                  | 18.6        | 199.1933                  | 57.0675, 112.9580                         | 2.3         | ↓      |
| Extracellular fluid |             |                           |                                           |             |        |
| 24                  | 0.9         | 204.1449                  | 86.0951                                   | 3.7         | ↓      |
| 25                  | 1.0         | 145.0732                  | 86.0619                                   | 2.7         | ↑      |
| 26                  | 1.0         | 276.1671                  | 86.0596, 132.1018                         | 2.7         | ↓      |
| 27                  | 1.1         | 248.1272                  | 123.0802, 81.0417, 221.1392               | 2.4         | ↓      |
| 28                  | 1.1         | 159.0681                  | 132.0804, 130.0648, 72.0808               | 2.4         | ↓      |
| 29                  | 1.6         | 406.1302                  | 122.0696                                  | 2.4         | ↓      |
| 30                  | 2.4         | 320.1369                  | 285.1276, 138.0504, 146.0648,<br>117.1022 | 3.0         | ↓      |
| 31                  | 2.7         | 283.1051                  | 68.0494, 114.0507, 164.9309               | 3.5         | ↓      |
| 32                  | 7.1         | 1202.4052                 | -                                         | 2.2         | ↓      |
| 33                  | 7.8         | 735.2173                  | 428.0904                                  | 2.2         | ↓      |
| 34                  | 8.8         | 379.1557                  | 160.0430, 176.0697, 217.0611              | 3.4         | ↑      |
| 35                  | 10.4        | 424.1296                  | 160.0424, 217.0638                        | 2.0         | ↑      |
| 36                  | 12.4        | 268.1309                  | -                                         | 2.6         | ↑      |
| 37                  | 15.1        | 386.1725                  | 105.0729                                  | 2.8         | ↑      |
| 38                  | 15.1        | 526.2786                  | -                                         | 2.7         | ↑      |

\*↑: The metabolite (on average) is more abundant in CisPt; ↓: The metabolite (on average) is less abundant in CisPt.
